# Supplementary material for: Remarkable hydrogen storage properties at low temperature of Mg–Ni composites prepared by hydriding combustion synthesis and mechanical milling
Source: Royal Society of Chemistry journal article supplement (doi:10.1039/c5ra09754a), 2015-01-01
Supplement: c5ra09754a1.pdf [file c5ra09754a1.pdf]

## Electronic Supplementary Information

# Remarkable hydrogen storage properties at low temperature of Mg-Ni composites prepared by hydriding combustion synthesis and mechanical milling

Yajun Tan, Qifeng Mao, Wei Su, Yunfeng Zhu, Liquan Li\*

College of Materials Science and Engineering, Nanjing Tech University, 5 Xinfan Road, Nanjing, 210009, P.R. China. E-mail: lilq@njtech.edu.cn; Tel: +86-25-83587255

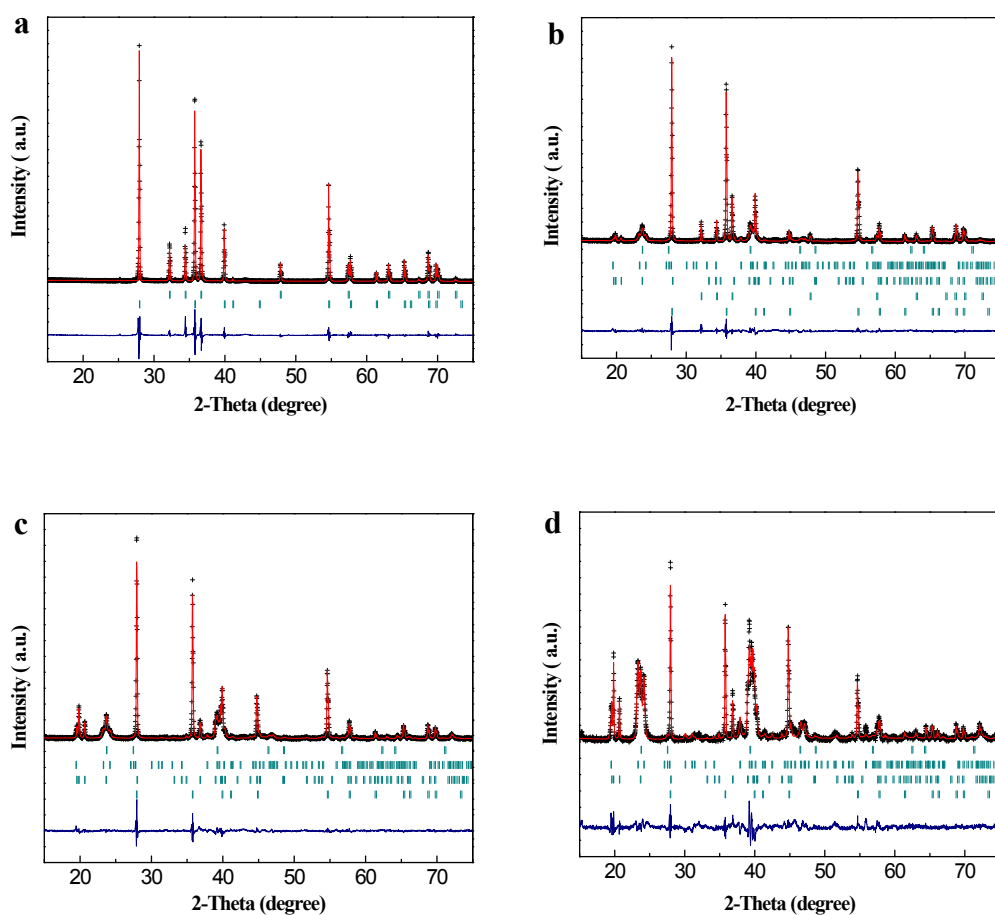

Fig. S1 The Rietveld analysis profiles of Mg<sub>100-x</sub>Ni<sub>x</sub> (x=0, 5, 10 and 20) composites prepared by

HCS. Observed (dots), Calculated (top line) and different curves (bottom line)

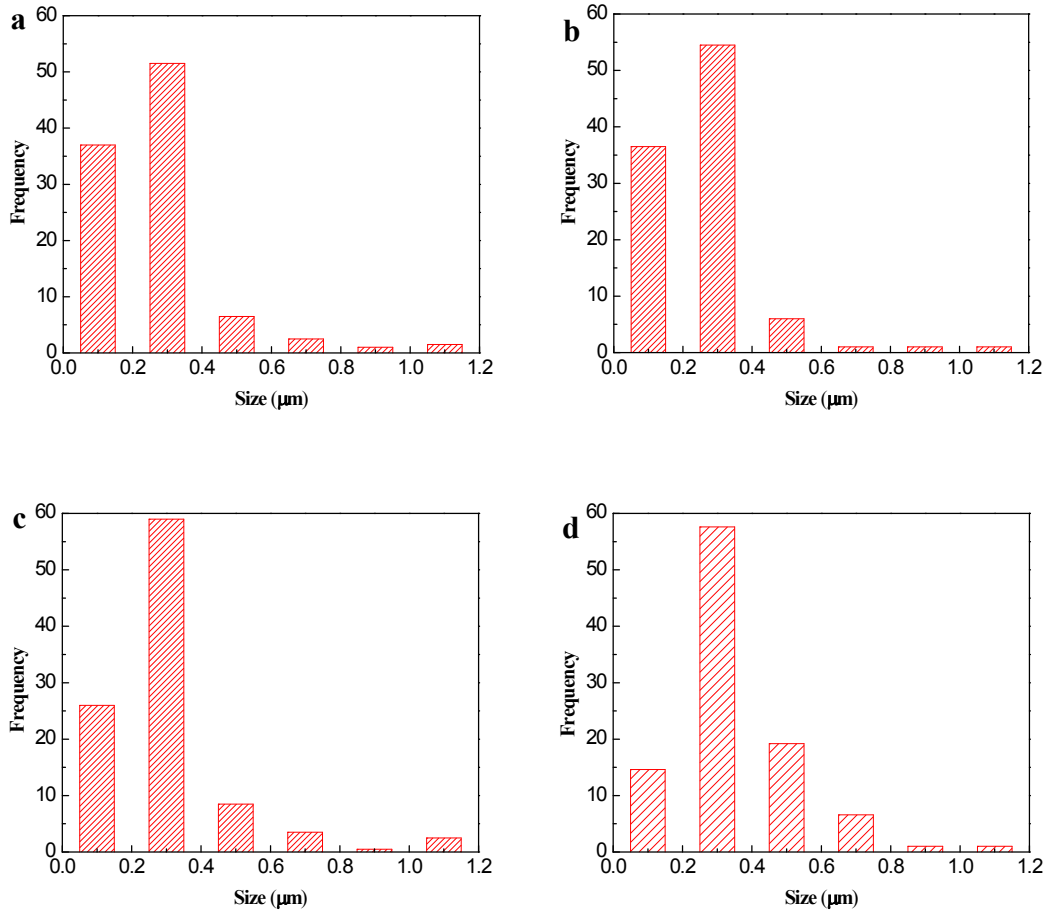

Fig. S2 Particle size distribution of Mg<sub>100-x</sub>Ni<sub>x</sub> (x=0, 5, 10 and 20) composites according to the SEM images: (a), (b), (c) and (d) are corresponding to x=0, 5, 10 and 20, respectively.

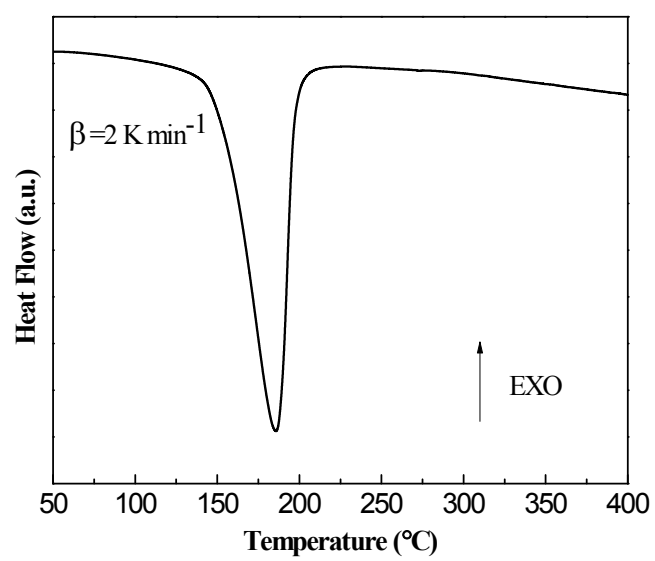

Fig. S3. DSC curve of  $\text{Mg}_2\text{NiH}_4$  prepared by HCS+MM

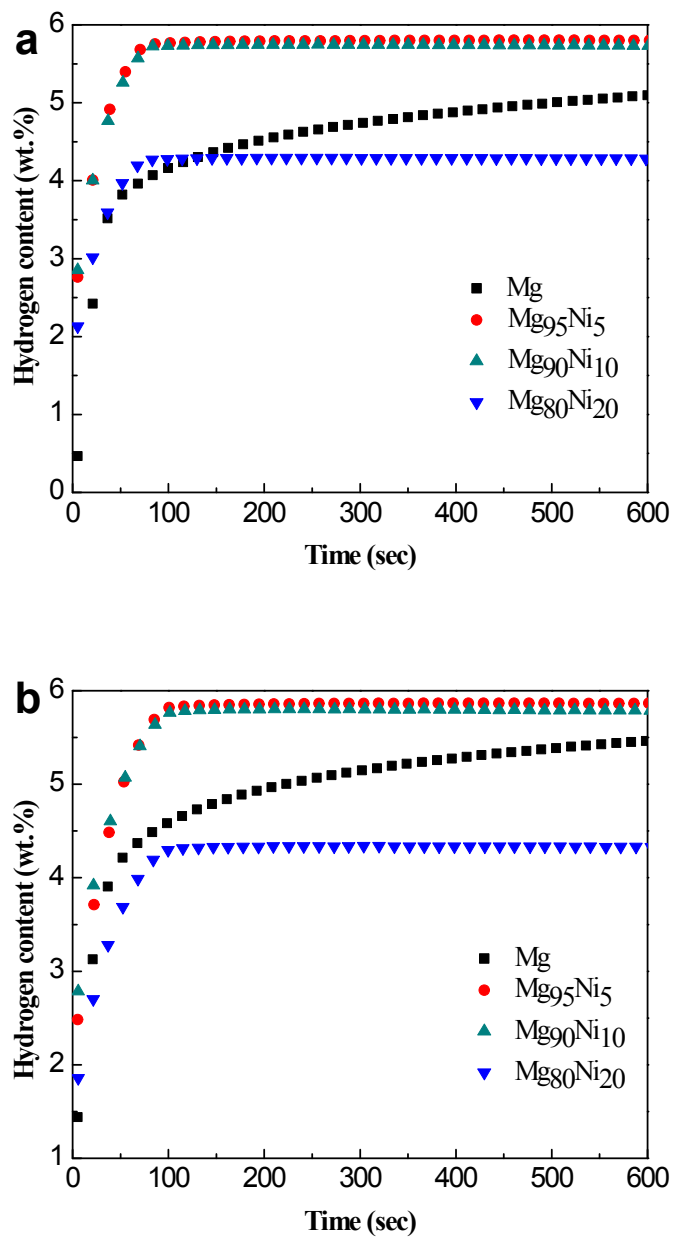

Fig. S4 Isothermal hydrogenation curves of the HCS+MM products of Mg<sub>100-x</sub>Ni<sub>x</sub> (x=0, 5, 10 and 20) at (a) 493 K and (b) 523 K under 3.0 MPa hydrogen pressure

Table S1 Hydrogen absorption capacities of  $\text{Mg}_{100-x}\text{Ni}_x$  ( $x=0, 5, 10$  and  $20$ ) composites at 473 K, 493 K and 523 K under 3.0 MPa hydrogen pressure within 600 s

| Temperature<br>(K) | Hydrogen absorption capacity (wt.%) |                             |                                |                                |
|--------------------|-------------------------------------|-----------------------------|--------------------------------|--------------------------------|
|                    | Mg                                  | $\text{Mg}_{95}\text{Ni}_5$ | $\text{Mg}_{90}\text{Ni}_{10}$ | $\text{Mg}_{80}\text{Ni}_{20}$ |
| 313 K              | 0                                   | 1.32                        | 2.07                           | 3.70                           |
| 473 K              | 3.25                                | 5.80                        | 5.69                           | 4.27                           |
| 493 K              | 5.21                                | 5.79                        | 5.73                           | 4.28                           |
| 523 K              | 5.58                                | 5.86                        | 5.78                           | 4.32                           |

Table S2 Isothermal dehydrogenation curves of  $\text{Mg}_{100-x}\text{Ni}_x$  ( $x=0, 5, 10$  and  $20$ ) composites at 473 K, 493 K and 523 K under 0.001 MPa hydrogen pressure within 120 min

| Temperature<br>(K) | Hydrogen desorption capacity (wt.%) |                             |                                |                                |
|--------------------|-------------------------------------|-----------------------------|--------------------------------|--------------------------------|
|                    | Mg                                  | $\text{Mg}_{95}\text{Ni}_5$ | $\text{Mg}_{90}\text{Ni}_{10}$ | $\text{Mg}_{80}\text{Ni}_{20}$ |
| 473 K              | 0.22                                | 0.87                        | 1.09                           | 1.84                           |
| 493 K              | 0.30                                | 2.21                        | 2.46                           | 2.76                           |
| 523 K              | 0.78                                | 5.36                        | 5.24                           | 3.92                           |

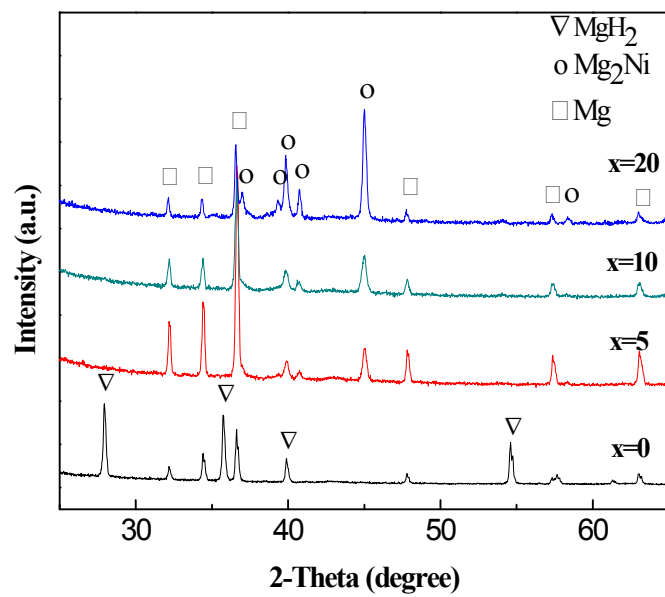

Fig. S5. XRD patterns of Mg<sub>100-x</sub>Ni<sub>x</sub> (x=0, 5, 10 and 20) composites after dehydrogenation at 523

K

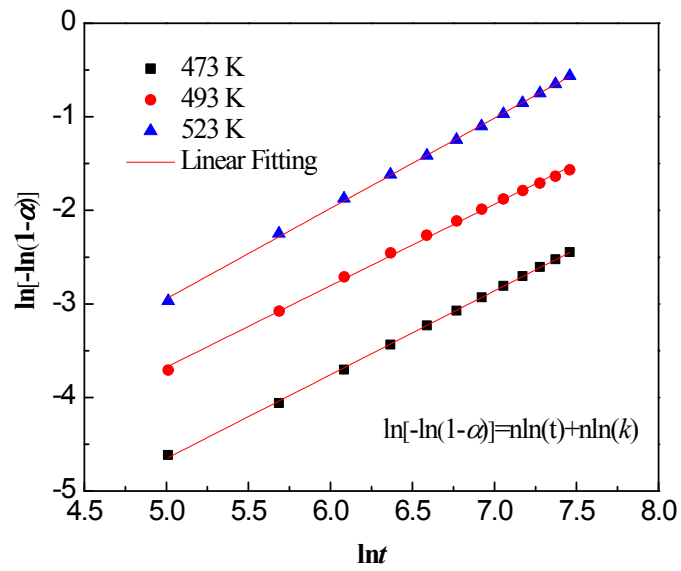

Fig. S6. JMA plots of  $\ln[-\ln(1-\alpha)]$  vs  $\ln(t)$  for the dehydrogenation of the  $\text{Mg}_{90}\text{Ni}_{10}$  composite at different temperatures. The samples with reacted fraction of  $0 < \alpha < 0.5$  was used
